# Supplementary material for: A hybrid of CdS/HCa2Nb3O10 ultrathin nanosheets for promoting photocatalytic hydrogen evolution
Source: Royal Society of Chemistry journal article supplement (doi:10.1039/c7dt03027d), 2017-01-01
Supplement: c7dt03027d1.pdf [file c7dt03027d1.pdf]

†Electronic Supplementary Information

**A hybrid of CdS/HCa<sub>2</sub>Nb<sub>3</sub>O<sub>10</sub> ultrathin nanosheets for promoting  
photocatalytic hydrogen evolution**

*Jinhua Xiong<sup>a,b</sup>, Kaiqiang Jing<sup>a</sup>, Junhua Zou<sup>a</sup>, Shijing Liang<sup>a</sup>, Ling Wu<sup>a\*</sup>*

a, State key laboratory of photocatalysis on energy and environment, Fuzhou University, Fuzhou 350002, P. R. China.

b, College of chemistry and material science, Longyan University, Longyan 364000, P. R. China.

\* Corresponding author: Ling Wu; E-mail: [wuling@fzu.edu.cn](mailto:wuling@fzu.edu.cn); Phone: +86-591-13655006063; Fax: +86-591-83779105.

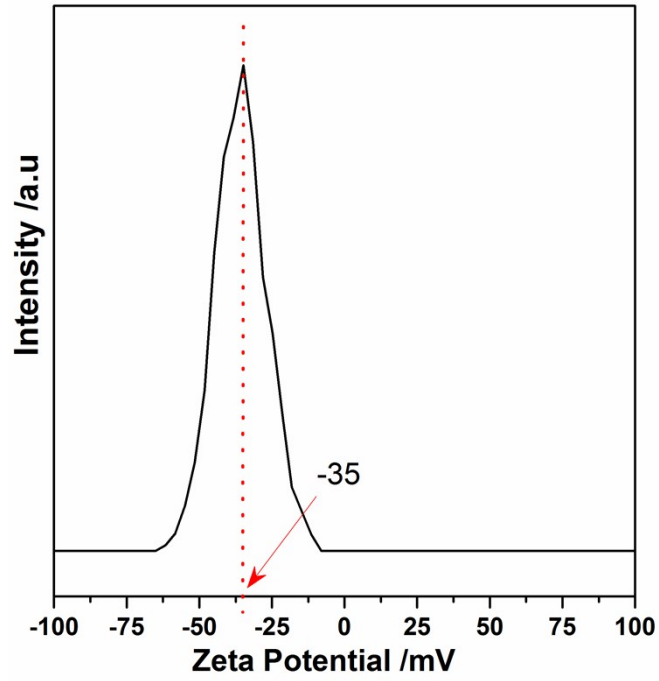

Fig. S1 the Zeta potential of the  $\text{Ca}_2\text{Nb}_3\text{O}_{10}^-$  nanosheet suspensions

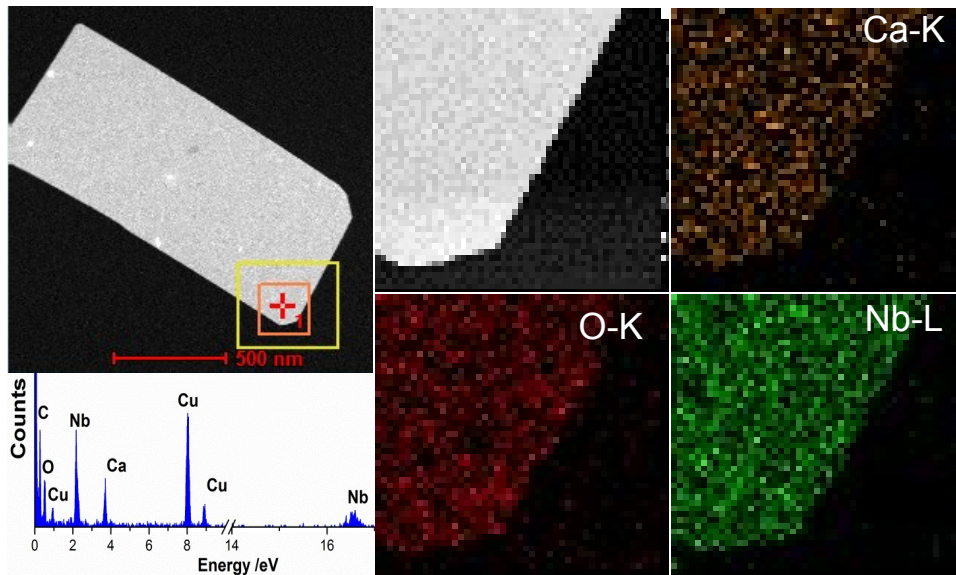

Fig. S2 STEM-EDX mapping of the calcium niobate nanosheet.

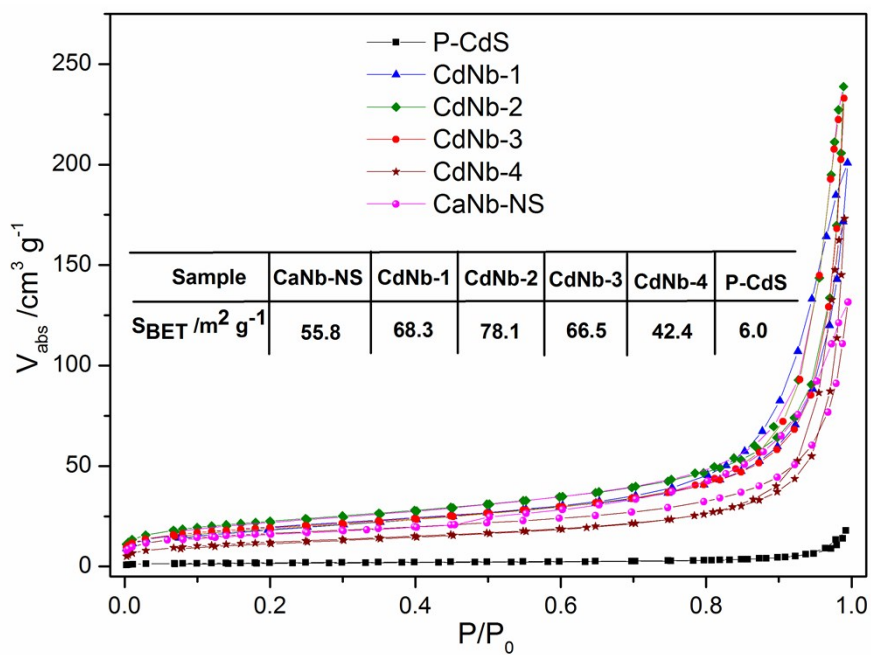

Fig. S3 BET adsorption-desorption isotherm of samples.

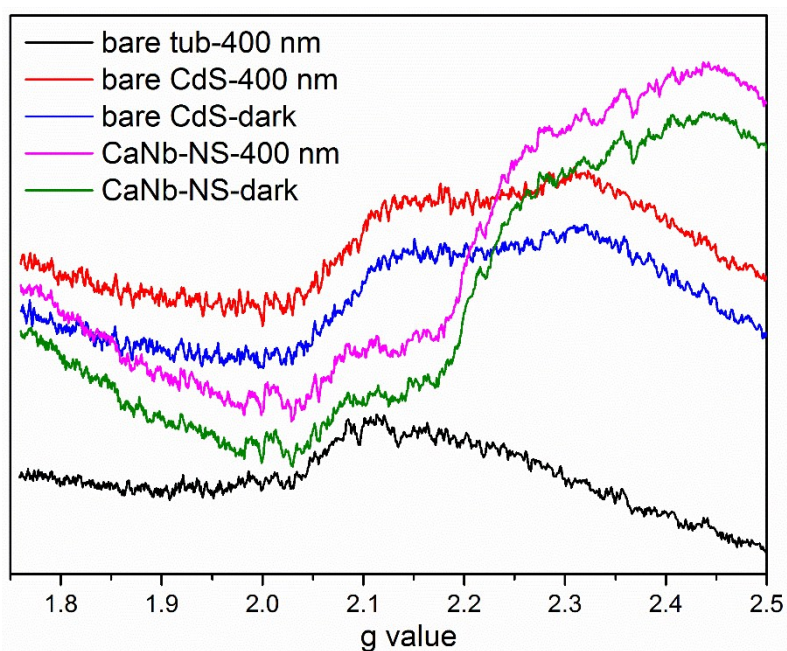

Fig. S4 the EPR spectra of bare CdS and CaNb-NS carried out under dark and light irradiation ( $\lambda > 400$  nm).

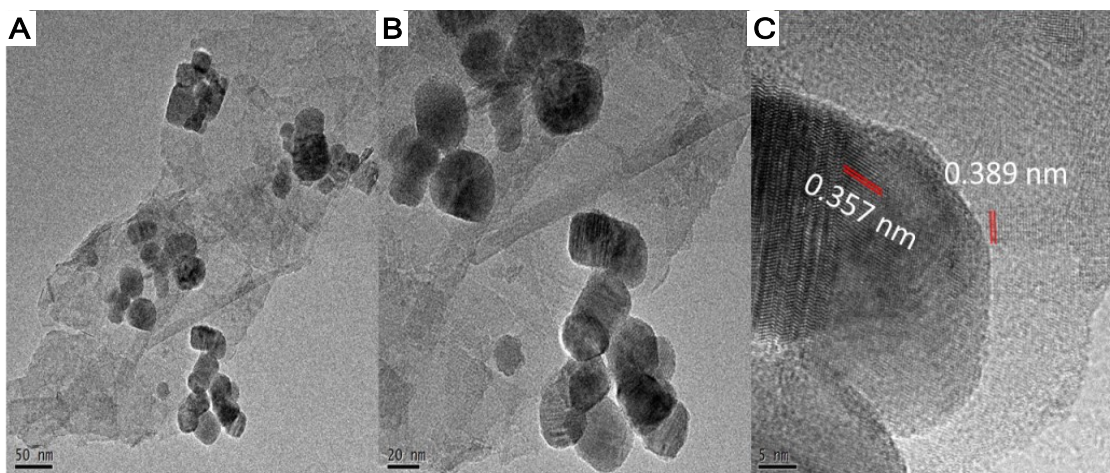

Fig. S5 TEM/HRTEM images of the CdNb-2 after reaction.

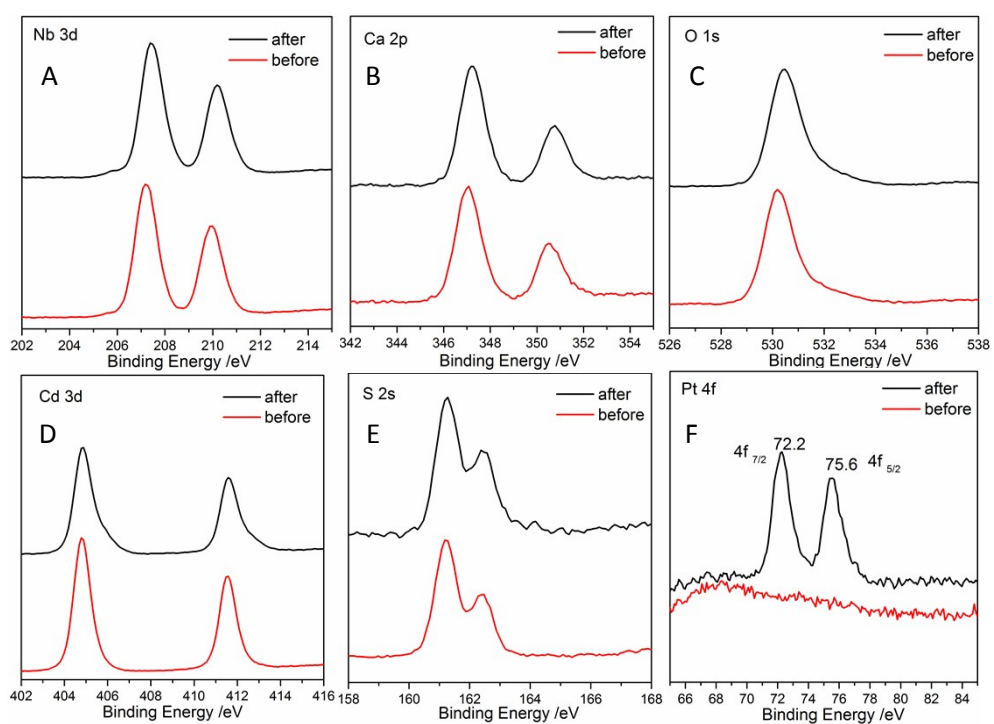

Fig. S6 the XPS spectra for the samples before and after reaction

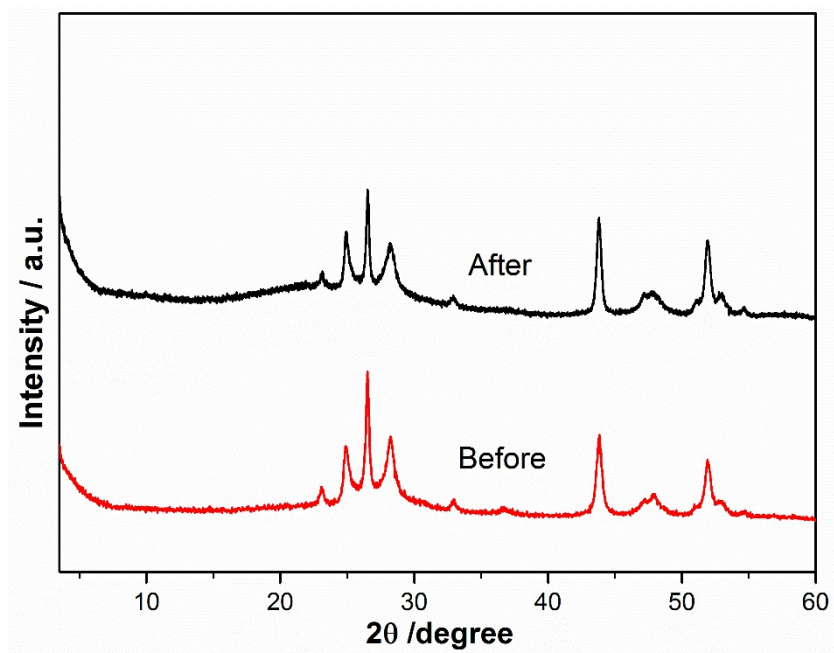

Fig. S7 the XRD patterns for the samples before and after reaction
